# Supplementary material
Source: PubMed Central journal article supplement (PMC5470411)
Supplement: jamacardiol-e165501-s001.pdf [file jamacardiol-e165501-s001.pdf]

## Supplementary Online Content

Fordyce CB, Douglas PS, Roberts RS, et al; Prospective Multicenter Imaging Study for Evaluation of Chest Pain (PROMISE) Investigators. Identification of patients with stable chest pain deriving minimal value from noninvasive testing: the PROMISE minimal-risk tool, a secondary analysis of a randomized clinical trial. *JAMA Cardiol*. Published online February 15, 2016. doi:10.1001/jamacardio.2016.5501

**eAppendix 1.** PROMISE Trial Organization

**eAppendix 2.** Statistical Methods

**eTable 1.** Complete Baseline Clinical Characteristics in the Full CCTA Analysis Population

**eTable 2.** Prospective Categorization of Noninvasive Imaging Test Results in the Anatomical and Functional Testing Arms of the Study

**eFigure 1.** Model Calibration in the CCTA Validation Cohort

**eFigure 2.** Comparison of Risk Scores for the Prediction of Minimal Risk

**eReferences**

This supplementary material has been provided by the authors to give readers additional information about their work.

## **eAppendix 1. PROMISE Trial Organization**

### **Executive Committee**

Pamela S. Douglas, MD, Duke Clinical Research Institute, Durham, NC  
Lawton Cooper, MD, National Heart, Lung, and Blood Institute, Bethesda, MD  
Udo Hoffmann, MD, MPH, Massachusetts General Hospital, Boston, MA  
Kerry Lee, PhD, Duke Clinical Research Institute, Durham, NC  
Daniel Mark, MD, MPH, Duke Clinical Research Institute, Durham, NC

### **Data and Safety Monitoring Board**

Robert Bonow, MD, Northwestern University Feinberg School of Medicine, Chicago, IL  
Garnet Anderson, PhD, Fred Hutchinson Cancer Research Center, Seattle, WA  
Alain Bertoni, MD, MPH, Wake Forest University School of Medicine, Winston-Salem, NC  
J. Jeffrey Carr, MD, Wake Forest University School of Medicine, Winston-Salem, NC  
James K. Min, MD, New York-Presbyterian Hospital/Weill-Cornell Medical Center, New York, NY  
Michael Proschan, PhD, National Institutes of Health, Bethesda, MD  
John A. Spertus, MD, MPH, Washington University School of Medicine, St. Louis, MO  
Connie M. Ulrich, PhD, RN, University of Pennsylvania School of Nursing, Philadelphia, PA

### **Operations Steering Committee (in addition to Executive Committee)**

Hussein R. Al-Khalidi, PhD, Duke Clinical Research Institute, Durham, NC  
Denise Bonds, MD, MPH, National Heart, Lung, and Blood Institute, Bethesda, MD  
Nakela Cook, MD, National Heart, Lung, and Blood Institute, Bethesda, MD  
Rowena J. Dolor, MD, MHS, Duke Clinical Research Institute, Durham, NC  
Alan Go, MD, Kaiser Permanente Division of Research, Oakland, CA  
Christopher Fordyce, MD, Duke Clinical Research Institute, Durham, NC  
Tina Harding, RN, BSN, Duke Clinical Research Institute, Durham, NC  
Sarah Hayden, Duke Clinical Research Institute, Durham, NC  
Andrzej Kosinski, PhD, Duke Clinical Research Institute, Durham, NC  
Mitchell W. Krucoff, MD, Duke Clinical Research Institute, Durham, NC  
Eric Leifer, PhD, National Heart, Lung, and Blood Institute, Bethesda, MD  
Beth Martinez, Duke Clinical Research Institute, Durham, NC  
Daniel W. Mudrick, MD, MPH, Duke Clinical Research Institute, Durham, NC  
Manesh R. Patel, MD, Duke Clinical Research Institute, Durham, NC  
Michael H. Picard, MD, Massachusetts General Hospital, Boston, MA  
Geoffrey Rubin, MD, Duke University School of Medicine, Durham, NC  
Kristen Salvaggio, Massachusetts General Hospital, Boston, MA  
Ricky M. Schneider, MD, Holy Cross Hospital, Fort Lauderdale, FL  
Alexandra Shen, MD, Duke Clinical Research Institute, Durham, NC  
Jean Claude Tardif, MD, Montréal Heart Institute, Montreal, Canada  
Wanda Tate, Duke Clinical Research Institute, Durham, NC  
James E. Udelson, MD, Tufts University School of Medicine, Boston, MA  
John Vavalle, MD, Duke Clinical Research Institute, Durham, NC  
Eric J. Velazquez, MD, Duke Clinical Research Institute, Durham, NC

### **Diagnostic Testing Coordinating Center**

Udo Hoffmann, MD, MPH, Massachusetts General Hospital, Boston, MA  
Charles Apgar, MBA, American College of Radiology, Philadelphia, PA

Kristen Salvaggio, Massachusetts General Hospital, Boston, MA  
James E. Udelson, MD, Tufts University School of Medicine, Boston, MA

### **Core Laboratories**

CTA: Udo Hoffmann, MD, MPH (PI), Massachusetts General Hospital, Boston, MA  
Stephan Achenbach, MD (overreads), University of Erlangen, Germany  
Erin Corsini, Massachusetts General Hospital, Boston, MA  
Brian B. Ghoshhajra, MD, MBA (sites, radiation), Massachusetts General Hospital, Boston, MA  
Michael Lu, MD, Massachusetts General Hospital, Boston, MA  
Quynh Truong, MD, MPH (online reader certification), Massachusetts General Hospital, Boston, MA

Nuclear imaging: James E. Udelson, MD, Tufts University School of Medicine, Boston, MA  
Debra Kinan, RT(N), Tufts University School of Medicine, Boston, MA

Stress echocardiography: Michael H. Picard, MD, Massachusetts General Hospital, Boston, MA

Stress ECG: Mitchell W. Krucoff, MD, Duke Clinical Research Institute, Durham, NC  
Coronary angiography: Manesh Patel, MD, Duke Clinical Research Institute, Durham, NC

## **PROMISE Enrolling Investigators and Sites**

### **UNITED STATES**

#### **Alabama**

Edward Carlos, Sunbelt Research Group LLC; Jason Cole, Cardiology Associates; Michael Johnson, North Huntsville Family Care PC; Mathew Krista, PrimeCare; Michael Ridner, The Heart Center PC

#### **Arizona**

Aiden Abidov, University Medical Center; Barbara Barker, Advanced Cardiac Specialists; Roger Bies, Mercy Gilbert Medical Center

#### **Arkansas**

David Jones, Arkansas Cardiology PA; Larry Weathers, Mercy Heart and Vascular Center

#### **California**

Timothy Albert, Salinas Valley Memorial Hospital; Kevin Ariani, Northridge Hospital Medical Center; Supratim Banerjee, Comprehensive Cardiovascular Medical Group; Matthew Budoff, Los Angeles Biomedical Research Institute; Donald Chang, V.A. Greater Los Angeles Healthcare System; Steven Forman, Los Alamitos Cardiovascular; Gary Foster, V.A. Loma Linda Healthcare System; Joe Hsu, Kaiser Permanente Medical Center; James Jang, Kaiser Permanente; Andrew Kahn, University of California San Diego Medical Center; Ronald Karlsberg, Cardiovascular Research Foundation of Southern California; Mayil Krishnam, University of California Irvine Medical Center; Margaret Lee, Olive View - UCLA Medical Center; Norman Lepor, Westside Medical Associates of Los Angeles; Irving Loh, Westlake Medical Research; Mark Lurie, Torrance

Memorial Medical Center; Michael McConnell, Stanford University Medical Center; Stefan Ruehm, Ronald Reagan UCLA Medical Center; Gabriel Vorobiof, Long Beach Memorial Hospital

### **Colorado**

Simeon Abramson, Porter Adventist Hospital; Steven Friedrich, South Denver Cardiology Associates PC; Jamaluddin Moloo, University of Colorado Hospital; Stephen Treat, Medical Center of the Rockies

### **Connecticut**

Andrew Keller, Danbury Hospital; Clifford Yang, University of Connecticut Health Center

### **Florida**

Dean Bramlet, Dean Bramlet MD PA; Edward Braun, Midtown Medical Center; Jean Foucauld, Cardiology Partners Research Institute; Akash Ghai, Tallahassee Research Institute; Pablo Guzman, Cardiology Associates of Fort Lauderdale; Robert Hendel, University of Miami Hospital; Julian Javier, Pharma Research International Inc.; Carsten Schmalfluss, Malcom Randall V.A. Medical Center; Ricky Schneider, Holy Cross Medical Group; Carlos Sotolongo, Baptist Heart Specialists; Alan Tannenbaum, Primary Care Associates; Barry Weinstock, Orlando Regional Medical Center

### **Georgia**

Kimberly Champney, Northside Hospital; Stephen Frohwein, Saint Josephs Hospital of Atlanta; Lonnie Jenkins, Synergy Therapeutic Partners; Devendra Koganti, Southern Heart Research Institute LLC; Sheldon Litwin, Georgia Regents University; Patricia Shapiro, South Coast Medical Group

### **Hawaii**

Cyril Leung, Kaiser Permanente Moanalua Medical Center

### **Idaho**

David Hinchman, Saint Lukes Boise Medical Center

### **Illinois**

Stanley Clark, Midwest Heart Foundation; Sorin Danciu, Advocate Medical Group - Heart and Vascular of Illinois; Jerome Hines, Illinois Heart and Vascular Foundation; Amit Patel, University of Chicago Medical Center; Daniel Sullivan, Midwest Heart Foundation; Dinker Trivedi, Advocate Christ Medical Center; Mladen Vidovich, University of Illinois at Chicago

### **Indiana**

Jo Mahenthiran, Indiana Heart Hospital; Saeed Shaikh, Indiana Heart Physicians Inc.; Shawn Teague, Indiana University Health

### **Iowa**

Craig Clark, Radiology Consultants of Iowa; Enrico Martin, Iowa Heart Center; Gardar Sigurdsson, University of Iowa Hospitals and Clinics

**Kansas**

Steve Bloom, Midwest Cardiology Associates; Michael Hagley, Promise Regional Medical Center

**Kentucky**

William Schmidt II, Norton Cardiovascular Associates; Vincent Sorrell, University of Kentucky Hospital

**Louisiana**

Michael Turner, Cardiovascular Specialist of Southwest Louisiana

**Maine**

Robert Weiss, Maine Research Associates

**Maryland**

Steven Hearne, Delmarva Heart LLC; Scott Jerome, University of Maryland Cardiology Physicians

**Massachusetts**

Alexander Morss, South Shore Hospital; Rick Ruberg, Boston Medical Center; Quynh Truong, Massachusetts General Hospital

**Michigan**

Khaled Abdul-Nour, Henry Ford Health System; Kavitha Chinnaiyan, William Beaumont Hospital; Tauqir Goraya, Michigan Heart PC; John Heath, William Beaumont Hospital - Troy; Mark Meengs, Mercy Health Muskegon; George Nahhas, Oakwood Hospital and Medical Center - Dearborn; Majed Nounou, Cardiology Consultants of East Michigan; Souheil Saba, Saint John Providence Park Hospital; Susan Sallach, Michigan Cardiovascular Institute

**Minnesota**

Wilson Ginete, Essentia Health Saint Marys Medical Center; Gregory Helmer, University of Minnesota Heart Care; Mary McLaurin, North Memorial Medical Center; Patricia Pellikka, Mayo Clinic; Jamie Pelzel, CentraCare Heart and Vascular Center at Saint Cloud Hospital

**Mississippi**

William Carroll, Cardiology Associates of North Mississippi; Arthur Martin, Hattiesburg Clinic; Andrew Rivard, University of Mississippi Medical Center

**Missouri**

Jeffrey Ciaramita, Saint Johns Mercy Heart Hospital; Zafir Hawa, North Kansas City Hospital; Pamela Woodard, Barnes Jewish Hospital

**Montana**

Alexander Jehle, Saint Patrick Hospital and Health Sciences Center

**Nebraska**

Michael Delcore, The Cardiac Center of Creighton University; Thomas Porter, University of Nebraska Medical Center; Eric Van De Graaff, Alegent Midlands Community Hospital

### **New Jersey**

Navin Budhwani, The Valley Hospital; Renee Bullock-Palmer, Deborah Heart and Lung Center; Andrey Espinoza, Hunterdon Medical Center; John Kostis, University of Medicine and Dentistry of New Jersey/Robert Wood Johnson Medical School; Muhammad Mustafa, Capital Cardiology Associates

### **New Mexico**

Brendan Cavanaugh, New Mexico Heart Institute PA

### **New York**

Randy Cohen, Saint Lukes Roosevelt Hospital Center; Robert Donnino, V.A. New York Harbor Healthcare System - Manhattan Campus; Mario Garcia, Montefiore Medical Center; Dennis Goodman, New York Medical Associates; John Heitner, New York Methodist Hospital; Mazullah Kamran, Elmhurst Hospital; Ellis Lader, MidValley Cardiology; Michael Marmulstein, Albany Associates in Cardiology; Dhananjai Menzies, Bassett Medical Center; Robert Morris, Capital Cardiology Associates; Brian Page, University at Buffalo; Chong Park, New York Hospital of Queens; Michael Poon, Stony Brook University Medical Center; Michael Wilson, Millard Fillmore Suburban Hospital

### **North Carolina**

Mahmoud Atieh, Sanford Cardiology; David Bohle, Forsyth Medical Center; Rowena Dolor, Primary Care Research Consortium at Duke Clinical Research Institute; Michael Dulin, Carolinas Medical Center Eastland Family Practice; Christian Gring, Wake Heart and Vascular Associates; Joseph Hakas, Pinehurst Medical Clinic Inc.; Dalton McLean, Lebauer Cardiovascular Research Foundation; Mark Rorie, Asheville Cardiology Associates; Kevin Sharkey, Novant Health Heart and Vascular Institute

### **North Dakota**

Yassar Almanaseer, Essentia Health

### **Ohio**

William Dirkes, Sentral Clinical Research Services; Jonathan Goldberg, Louis Stokes Cleveland VA Medical Center; Mark Iler, Summa Health System; Karen Kutoloski, Metro Health System; Mohammed Maaieh, Northwest Ohio Cardiology Consultants; John Mashny, Bethesda North Hospital; Robert Pelberg, Lindner Clinical Trial Center; David Richards, Riverside Methodist Hospital; Jodi Tinkel, The University of Toledo

### **Oklahoma**

George Chrysant, Integris Baptist Medical Center; Roger Des Prez, Oklahoma Heart Institute; Gregory Hill, Warren Cancer Research Foundation/Saint Francis Hospital; Iftikhar Hussain, Vital Prospects Clinical Research Institute PC

### **Oregon**

Michael Shapiro, Oregon Health and Science University

### **Pennsylvania**

Christopher Allen, Donahue Cardiology Associates; Zaruhi Babayan, The Guthrie Clinic; Terry Bauch, Geisinger Medical Center; Jennifer Berliner, V.A. Pittsburgh Healthcare System; Alfred Bove, Temple University Hospital; Donald Fox, Eastwick Primary Care PC; Ron Jacob, Lancaster Heart and Stroke Foundation; Carlos Jamis-Dow, Penn State Milton S Hershey Medical Center; Venkatesh Nadar, Capital Area Research LLC; Thomas Phiamolis, Lankenau Medical Center

### **South Carolina**

David Gregg, Medical University of South Carolina; David Isbell, Columbia Heart; Steven Johnson, Upstate Cardiology PA; Priya Kumar, Piedmont Cardiology Associates

### **Tennessee**

Shobha Hiremagalur, Blue Ridge Medical Management Corporation; David Huneycutt Jr, Centennial Heart Cardiovascular Consultants; Elie Korban, Kore Cardiovascular Research; Harry Severance, Erlanger Medical Center

### **Texas**

Subhash Banerjee, V.A. North Texas Health Care System; Gurpreet Baweja, Texas Health Research and Education Institute; John Erwin III, Scott and White Memorial Hospital; Osvaldo Gigliotti, Seton Medical Center; Muhammad Khan, North Dallas Research Associates; Ira Lieber, Texas Cardiology Associates of Houston; Frank Navetta, Tyler Cardiovascular Consultants PA; John Osborne, State of the Heart Cardiology; Ahmad Slim, Brooke Army Medical Center; Richard Wilks, BHS Specialty Network Inc.

### **Virginia**

Anu George, Seven Corners Medical Center; Aaron Hartman, Virginia Research Center LLC; Robert Levitt, National Clinical Research Inc.; Charles Phillips, Virginia Cardiovascular Specialists; Michael Salerno, University of Virginia Health System; Brian Schietinger, Centra Health Cardiovascular Group; Jack Slowikowski, Carilion Clinic Cardiac Research

### **Washington**

Vinay Malhotra, Cardiac Study Center; L. Douglas Waggoner, Kootenai Heart Clinics LLC

### **West Virginia**

William Carter, Charleston Area Medical Center

### **Wisconsin**

Joshua Liberman, Wisconsin Cardiovascular Group; Timothy Logemann, Aspirus Heart and Vascular Institute; John Manley, Wheaton Franciscan Healthcare/The Wisconsin Heart Hospital; Steve Port, Aurora Cardiovascular Services; Mary Zasadil, University of Wisconsin Madison

**CANADA**

**Ontario**

Benjamin Chow, University of Ottawa Heart Institute

**Quebec**

Eric Larose, Institute de Cardiologie et de Pneumologie de Quebec; Jean-Claude Tardif, Montreal Heart Institute



## **eAppendix 2. Statistical Methods**

### *Application of Model*

Using the final model, the predicted probability of Minimal Risk was computed for each subject in both the CCTA cohort and the functional testing cohort. For each cohort, the distribution of predicted probabilities was divided into deciles where the first decile included patients with lowest predicted probabilities of Minimal Risk (i.e., the patients least likely to be Minimal Risk), and the 10th decile included patients with the highest predicted probabilities (i.e., the patients most likely to be Minimal Risk). The frequency (%) of cardiovascular death or MI was reported for the combined CCTA and functional arms, since the results from the overall results comparing testing strategies in the PROMISE trial were neutral.<sup>1</sup> Criteria used for test results categories are shown in eTable 1. Following model building and for model application purposes, patients were excluded if they 1) had missing test results or uninterpretable test results (92 patients in the CCTA arm, 95 patients in the functional arm) or 2) were missing any of the 10 variables required to compute the probability of Minimal Risk in the final model (46 patients in the CCTA arm and 48 patients in the functional arm), aside from total and HDL cholesterol, which were imputed due to having >5% missingness.

### *Model Performance Comparisons*

We compared the final Minimal Risk model to the predictive ability of 2 different scores currently used in clinical practice but not specifically designed for predicting Minimal Risk per our definition: 1) the Framingham Risk Score<sup>2</sup> and 2) the Combined Diamond–Forrester/ Coronary Artery Surgery Study (CASS) Score.<sup>3</sup> A logistic regression model was fit using the entire CCTA cohort and each of the 2 scores as predictors. The resulting c-statistics, as well as the corresponding receiver operating characteristic (ROC) curve for each model, including the PROMISE Minimal Risk model, were computed.

**eTable 1.** Complete Baseline Clinical Characteristics in the Full CCTA Analysis Population<sup>a</sup>

|                                                                      | <b>Minimal Risk<br/>(N=1156)</b> | <b>Other<br/>(N=3476)</b> | <b>All Subjects<br/>(N=4632)</b> | <b>p-value</b> |
|----------------------------------------------------------------------|----------------------------------|---------------------------|----------------------------------|----------------|
| Age, mean ± SD, y <sup>b</sup>                                       | 57.7 ± 7.18                      | 61.4 ± 8.30               | 60.5 ± 8.19                      | <.001          |
| Female sex <sup>b</sup>                                              | 746 (64.5%)                      | 1645 (47.3%)              | 2391 (51.6%)                     | <.0001         |
| Racial or ethnic minority <sup>b</sup>                               | 300 (26.2%)                      | 747 (21.6%)               | 1047 (22.7%)                     | 0.0014         |
| Physician estimate of likelihood of obstructive disease <sup>b</sup> |                                  |                           |                                  |                |
| Very low/low (≤30%)                                                  | 513 (44.4%)                      | 1204 (34.7%)              | 1717 (37.1%)                     | <.001          |
| Intermediate/high/very high (>30%)                                   | 642 (55.6%)                      | 2265 (65.3%)              | 2907 (62.9%)                     |                |
| Cardiac risk factor                                                  |                                  |                           |                                  |                |
| Hypertension <sup>b</sup>                                            | 665 (57.5%)                      | 2326 (66.9%)              | 2991 (64.6%)                     | <.0001         |
| Diabetes <sup>b</sup>                                                | 185 (16.0%)                      | 784 (22.6%)               | 969 (20.9%)                      | <.0001         |
| Metabolic Syndrome <sup>b</sup>                                      | 356 (30.8%)                      | 1367 (39.3%)              | 1723 (37.2%)                     | <.0001         |
| Dyslipidemia <sup>b</sup>                                            | 707 (61.2%)                      | 2412 (69.4%)              | 3119 (67.3%)                     | <.0001         |
| Family history of premature CAD <sup>b</sup>                         | 348 (30.2%)                      | 1166 (33.7%)              | 1514 (32.8%)                     | 0.0311         |
| Peripheral artery disease <sup>b</sup>                               | 12 (1.0%)                        | 65 (1.9%)                 | 77 (1.7%)                        | 0.0552         |
| History of TIA                                                       | 14 (1.2%)                        | 52 (1.5%)                 | 66 (1.4%)                        | 0.4783         |
| History of Stroke <sup>b</sup>                                       | 9 (0.8%)                         | 77 (2.2%)                 | 86 (1.9%)                        | 0.0017         |
| History of CVD <sup>b</sup>                                          | 27 (2.3%)                        | 151 (4.3%)                | 178 (3.8%)                       | 0.0021         |
| History of CAS <sup>b</sup>                                          | 1 (0.1%)                         | 23 (0.7%)                 | 24 (0.5%)                        | 0.0183         |
| NYHA Class <sup>b</sup>                                              |                                  |                           |                                  |                |
| Normal                                                               | 1125 (97.6%)                     | 3392 (98.1%)              | 4517 (98.0%)                     | 0.3372         |
| II or III                                                            | 28 (2.4%)                        | 64 (1.9%)                 | 92 (2.0%)                        |                |
| IV                                                                   | 0 (0.0%)                         | 2 (0.1%)                  | 2 (0.0%)                         |                |
| Tobacco smoking <sup>b</sup>                                         |                                  |                           |                                  | <.001          |
| Never                                                                | 667 (57.7%)                      | 1609 (46.3%)              | 2276 (49.1%)                     |                |
| Ever                                                                 | 488 (42.3%)                      | 1867 (53.7%)              | 2355 (50.9%)                     |                |
| History of depression                                                | 246 (21.3%)                      | 662 (19.0%)               | 908 (19.6%)                      | 0.0972         |

|                                                                | <b>Minimal Risk<br/>(N=1156)</b> | <b>Other<br/>(N=3476)</b> | <b>All Subjects<br/>(N=4632)</b> | <b>p-value</b> |
|----------------------------------------------------------------|----------------------------------|---------------------------|----------------------------------|----------------|
| Participate in physical activity                               | 610 (52.8%)                      | 1776 (51.2%)              | 2386 (51.6%)                     | 0.3635         |
| Risk burden                                                    |                                  |                           |                                  |                |
| Risk factors per patient                                       |                                  |                           |                                  | <.001          |
| N                                                              | 1156                             | 3476                      | 4632                             |                |
| Mean ± SD                                                      | 2.1 ± 0.99                       | 2.5 ± 1.09                | 2.4 ± 1.08                       |                |
| CAD equivalent <sup>b</sup>                                    | 215 (18.6%)                      | 920 (26.5%)               | 1135 (24.5%)                     | <.001          |
| Framingham Risk Score                                          |                                  |                           |                                  | <.001          |
| N                                                              | 1155                             | 3469                      | 4624                             |                |
| Mean ± SD                                                      | 14.9 ± 10.19                     | 23.4 ± 15.57              | 21.3 ± 14.89                     |                |
| Combined Diamond-Forrester/CASS, mean ± SD                     | 47.2 ± 20.58                     | 55.4 ± 21.25              | 53.3 ± 21.37                     | <.001          |
| ASCVD Pooled Cohort Risk Score                                 |                                  |                           |                                  | <.001          |
| N                                                              | 1144                             | 3438                      | 4582                             |                |
| Mean ± SD                                                      | 9.5 ± 8.47                       | 15.9 ± 11.90              | 14.3 ± 11.48                     |                |
| Chest pain characterization                                    |                                  |                           |                                  |                |
| Typical                                                        | 120 (10.4%)                      | 425 (12.2%)               | 545 (11.8%)                      | 0.2120         |
| Atypical                                                       | 907 (78.5%)                      | 2689 (77.4%)              | 3596 (77.6%)                     |                |
| Non-Cardiac                                                    | 129 (11.2%)                      | 362 (10.4%)               | 491 (10.6%)                      |                |
| Primary symptom <sup>b</sup>                                   |                                  |                           |                                  |                |
| Chest Pain                                                     | 906 (78.4%)                      | 2506 (72.2%)              | 3412 (73.7%)                     | <.001          |
| Dyspnea                                                        | 122 (10.6%)                      | 532 (15.3%)               | 654 (14.1%)                      |                |
| Other                                                          | 128 (11.1%)                      | 435 (12.5%)               | 563 (12.2%)                      |                |
| Primary symptom related to physical/mental stress <sup>b</sup> |                                  |                           |                                  |                |
| No                                                             | 597 (51.6%)                      | 1494 (43.0%)              | 2091 (45.2%)                     | <.001          |
| Yes                                                            | 430 (37.2%)                      | 1606 (46.2%)              | 2036 (44.0%)                     |                |
| Unknown                                                        | 129 (11.2%)                      | 373 (10.7%)               | 502 (10.8%)                      |                |

|                                                                              | <b>Minimal Risk<br/>(N=1156)</b> | <b>Other<br/>(N=3476)</b> | <b>All Subjects<br/>(N=4632)</b> | <b>p-value</b> |
|------------------------------------------------------------------------------|----------------------------------|---------------------------|----------------------------------|----------------|
| Primary symptom relieved by rest or nitroglycerin within 10 min <sup>b</sup> |                                  |                           |                                  |                |
| Always/Usually                                                               | 340 (29.4%)                      | 1178 (33.9%)              | 1518 (32.8%)                     | 0.0146         |
| Rarely/Never                                                                 | 269 (23.3%)                      | 786 (22.6%)               | 1055 (22.8%)                     |                |
| Unknown                                                                      | 547 (47.3%)                      | 1509 (43.4%)              | 2056 (44.4%)                     |                |
| Physical Exam                                                                |                                  |                           |                                  |                |
| BMI (kg/m <sup>2</sup> ) <sup>b</sup>                                        |                                  |                           |                                  | 0.1387         |
| N                                                                            | 1149                             | 3441                      | 4590                             |                |
| Mean ± SD                                                                    | 30.3 ± 6.04                      | 30.5 ± 6.02               | 30.5 ± 6.03                      |                |
| Pulse (bpm)                                                                  |                                  |                           |                                  | 0.7747         |
| N                                                                            | 1153                             | 3468                      | 4621                             |                |
| Mean ± SD                                                                    | 72.4 ± 11.66                     | 72.3 ± 11.85              | 72.3 ± 11.80                     |                |
| Normal (60-100 bpm)                                                          | 1002 (86.9%)                     | 2994 (86.3%)              | 3996 (86.5%)                     | 0.6230         |
| Abnormal                                                                     | 151 (13.1%)                      | 474 (13.7%)               | 625 (13.5%)                      |                |
| Diastolic BP                                                                 |                                  |                           |                                  | 0.8011         |
| N                                                                            | 1156                             | 3469                      | 4625                             |                |
| Mean ± SD                                                                    | 78.7 ± 10.34                     | 78.7 ± 10.15              | 78.7 ± 10.20                     |                |
| Systolic BP <sup>b</sup>                                                     |                                  |                           |                                  | <.001          |
| N                                                                            | 1156                             | 3469                      | 4625                             |                |
| Mean ± SD                                                                    | 128.7 ± 16.20                    | 131.9 ± 16.55             | 131.1 ± 16.52                    |                |
| Investigations                                                               |                                  |                           |                                  |                |
| GFR                                                                          |                                  |                           |                                  | 0.1266         |
| N                                                                            | 1142                             | 3441                      | 4583                             |                |
| Median (25 <sup>th</sup> , 75 <sup>th</sup> )                                | 77.5 (67.4, 89.5)                | 77.1 (66.6, 89.0)         | 77.2 (66.9, 89.2)                |                |
| Mean ± SD                                                                    | 80.4 ± 18.49                     | 79.3 ± 19.03              | 79.6 ± 18.90                     |                |
| Min, Max                                                                     | 36.4, 179.5                      | 33.5, 228.6               | 33.5, 228.6                      |                |
| GFR Categorical                                                              |                                  |                           |                                  |                |
| <60                                                                          | 122 (10.7%)                      | 461 (13.4%)               | 583 (12.7%)                      | 0.0171         |

|                                               | <b>Minimal Risk<br/>(N=1156)</b> | <b>Other<br/>(N=3476)</b> | <b>All Subjects<br/>(N=4632)</b> | <b>p-value</b> |
|-----------------------------------------------|----------------------------------|---------------------------|----------------------------------|----------------|
| ≥60                                           | 1020 (89.3%)                     | 2980 (86.6%)              | 4000 (87.3%)                     |                |
| Hemoglobin                                    |                                  |                           |                                  | 0.0607         |
| N                                             | 621                              | 1830                      | 2451                             |                |
| Median (25 <sup>th</sup> , 75 <sup>th</sup> ) | 14.1 (13.1, 14.9)                | 14.2 (13.2, 15.1)         | 14.2 (13.2, 15.0)                |                |

<sup>a</sup>Values are expressed as number (percentage) unless otherwise indicated.

<sup>b</sup>Variables included in the multivariable analysis.

<sup>#</sup>CAD risk equivalent was defined as diabetes, peripheral vascular disease, or cerebrovascular disease.

Abbreviations: ASCVD, atherosclerotic cardiovascular disease; CAD, coronary artery disease; CAS, carotid artery stenosis; CASS, Coronary Artery Surgery Study; CCTA, coronary computed tomographic angiography; CVD, cerebrovascular disease; NYHA, New York Heart Association; TIA, transient ischemic attack.

**eTable 2.** Prospective Categorization of Noninvasive Imaging Test Results in the Anatomical and Functional Testing Arms of the Study

|             |                     | Anatomic                                                                                                                                                          | Functional                                                                                                                                            |                                                                                                                                                                                                                                                                                                                    |                                                                                                                                                                                                                                                                                                                          |
|-------------|---------------------|-------------------------------------------------------------------------------------------------------------------------------------------------------------------|-------------------------------------------------------------------------------------------------------------------------------------------------------|--------------------------------------------------------------------------------------------------------------------------------------------------------------------------------------------------------------------------------------------------------------------------------------------------------------------|--------------------------------------------------------------------------------------------------------------------------------------------------------------------------------------------------------------------------------------------------------------------------------------------------------------------------|
| Test Strata |                     | Coronary CTA                                                                                                                                                      | ETT                                                                                                                                                   | Stress MPI                                                                                                                                                                                                                                                                                                         | Stress Echo                                                                                                                                                                                                                                                                                                              |
| Abnormal    | Severely abnormal   | <u>High-Risk CAD</u><br>≥2-vessel disease (≥70%) <u>or</u> ≥50% left main stenosis <u>or</u> ≥70% proximal LAD stenosis                                           | <u>Ischemic ECG</u><br>ST changes consistent with ischemia during stress + either severe ventricular arrhythmia <u>OR</u> hypotension                 | <u>Large territory inducible ischemia or mixed defect</u><br>Septal/anterior/apical territory or other single territory with transient ischemic dilatation or 2 or more coronary territories with ischemia                                                                                                         | <u>Large territory inducible ischemia or mixed defect</u><br>Wall motion abnormality or mixed abnormality (infarct and ischemia)<br>Isolated septal/anterior/apical or other single territory + ↓EF <35% during stress or 2 or more coronary territories                                                                 |
|             | Moderately abnormal | <u>Obstructive CAD</u><br>50 to <70% proximal LAD stenosis, ≥70% stenosis in 1 major vessels/branch, 50 to <70% stenosis in any major vessel or vessels/branches* | <u>Early positive TM</u><br>Failure to reach stage 2, <3:00 min with ST changes <u>OR</u> symptoms reproduced <u>OR</u> any arrhythmia or hypotension | <u>Inducible ischemia or mixed defect</u><br>Perfusion abnormality in one coronary territory (lateral or inferior/posterior) <u>OR</u><br><u>Normal imaging but early positive TM</u><br>Failure to reach stage 2, <3:00 min with ST changes <u>OR</u> symptoms reproduced <u>OR</u> any arrhythmia or hypotension | <u>Inducible ischemia or mixed defect</u><br>Wall motion abnormality or mixed abnormality (infarct and ischemia) in one coronary territory (lateral or inferior/posterior) <u>OR</u><br><u>Normal imaging but early positive TM</u><br>Failure to reach stage 2, <3:00 min with ST changes <u>OR</u> symptoms reproduced |

|        |                 |                                                                       |                                                                                                                                                                                                    |                                                                                                                                                                                                                                                                                                         |                                                                                                                                                                                                                                                                                                                                         |
|--------|-----------------|-----------------------------------------------------------------------|----------------------------------------------------------------------------------------------------------------------------------------------------------------------------------------------------|---------------------------------------------------------------------------------------------------------------------------------------------------------------------------------------------------------------------------------------------------------------------------------------------------------|-----------------------------------------------------------------------------------------------------------------------------------------------------------------------------------------------------------------------------------------------------------------------------------------------------------------------------------------|
|        |                 |                                                                       |                                                                                                                                                                                                    |                                                                                                                                                                                                                                                                                                         | OR any arrhythmia or hypotension                                                                                                                                                                                                                                                                                                        |
|        | Mildly abnormal | <u>Nonobstructive CAD</u><br><50% stenosis or <50% left main stenosis | <u>Late positive TM</u><br>More than stage 2, >3:00 min, but failure to finish protocol or target heart rate achieved due to ST changes OR symptoms reproduced<br>OR any arrhythmia or hypotension | <u>Positive ECG</u><br>Normal perfusion or fixed perfusion defect (Scar)<br>OR<br><u>Normal imaging but late positive TM</u><br>More than stage 2, >3:00 min, but failure to finish protocol or target heart rate achieved due to ST changes OR symptoms reproduced<br>OR any arrhythmia or hypotension | <u>Positive ECG</u> but normal wall motion or resting wall motion abnormality without inducible ischemia<br>OR<br><u>Normal imaging but late positive TM</u><br>More than stage 2, >3:00 min, but failure to finish protocol or target heart rate achieved due to ST changes OR symptoms reproduced<br>OR any arrhythmia or hypotension |
| Normal |                 | Normal                                                                | Normal                                                                                                                                                                                             | Normal                                                                                                                                                                                                                                                                                                  | Normal                                                                                                                                                                                                                                                                                                                                  |

\*For secondary categorization, mildly abnormal was defined as <70% luminal narrowing.

Abbreviations: CAD, coronary artery disease; CTA, computed tomographic angiography; ECG, electrocardiogram; ETT, exercise treadmill test; LAD, left anterior descending artery; MPI, myocardial perfusion imaging; TM, treadmill.

**eFigure 1.** Model Calibration in the CCTA Validation Cohort

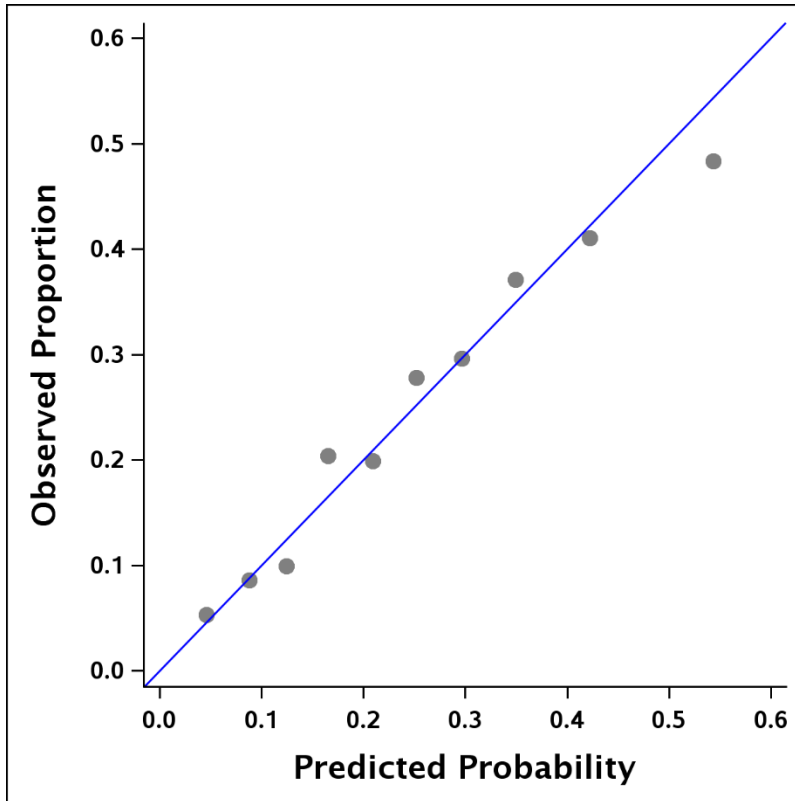

Observed proportion of Minimal Risk subjects (y-axis) by decile of predicted values (x-axis). Excellent calibration is demonstrated graphically and by the Hosmer–Lemeshow calibration statistic (chi-square=5.91, P=0.66).



**eFigure 2.** Comparison of Risk Scores for the Prediction of Minimal Risk

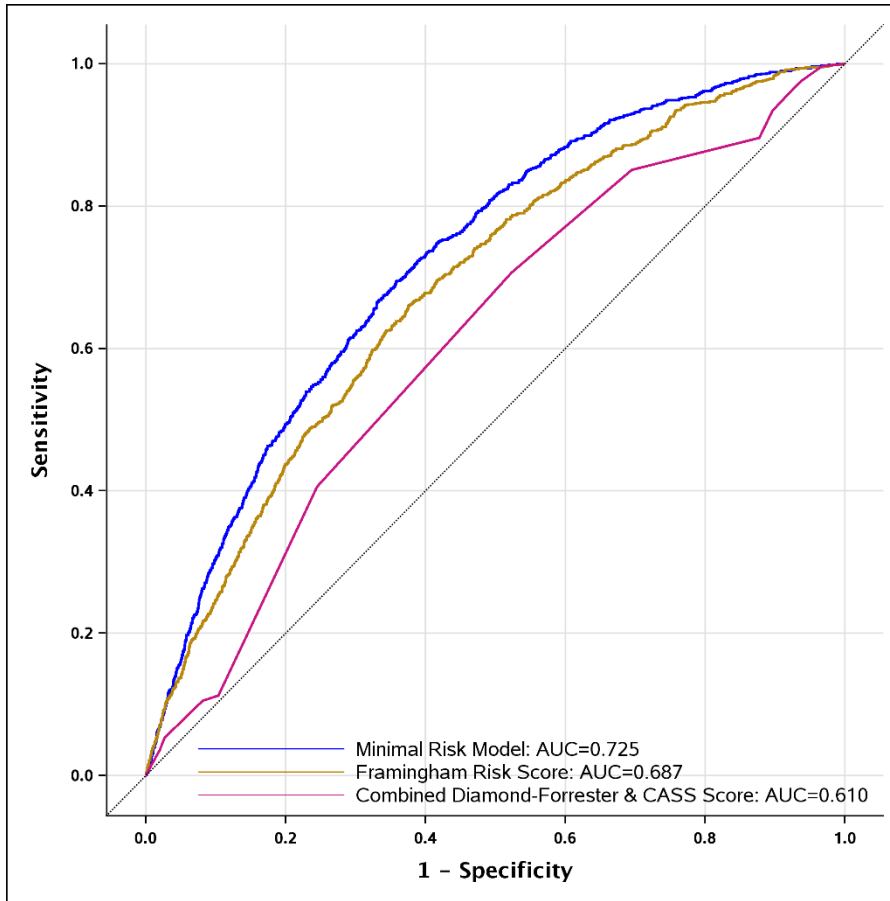

The PROMISE Minimal Risk score (area under the curve [AUC] =0.725; 95% CI, 0.709-0.741) better categorizes patients as Minimal Risk compared to both the Framingham (AUC=0.687; 95% CI, 0.670-0.704) and combined Diamond-Forrester/Coronary Artery Surgery Study Scores (AUC=0.610; 95% CI, 0.592-0.628).

## eReferences

1. Douglas PS, Hoffmann U, Patel MR, et al. Outcomes of anatomical versus functional testing for coronary artery disease. *N Engl J Med*. 2015;372(14):1291-1300.
2. D'Agostino RB Sr, Vasan RS, Pencina MJ, et al. General cardiovascular risk profile for use in primary care: the Framingham Heart Study. *Circulation*. 2008;117(6):743-753.
3. Fihn SD, Gardin JM, Abrams J, et al. 2012 ACCF/AHA/ACP/AATS/PCNA/SCAI/STS guideline for the diagnosis and management of patients with stable ischemic heart disease: executive summary: a report of the American College of Cardiology Foundation/American Heart Association task force on practice guidelines, and the American College of Physicians, American Association for Thoracic Surgery, Preventive Cardiovascular Nurses Association, Society for Cardiovascular Angiography and Interventions, and Society of Thoracic Surgeons. *Circulation*. 2012;126(25):3097-3137.
